# Supplementary material
Source: Springer Nature journal article supplement (https://www.springermedizin.de/resource/supplementary/12961_2004_8_MOESM1_ESM.pdf/9571198)

## CONCEPT

## INDICATOR

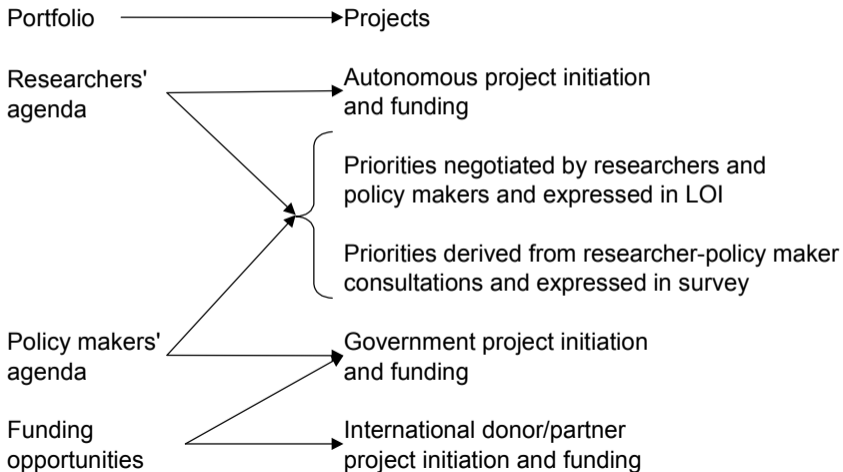

Supplement: MOESM1 [file 9571198]
